# Supplementary material for: Genomic signatures defining responsiveness to allopurinol and combination therapy for lung cancer identified by systems therapeutics analyses
Source: PubMed Central journal article supplement (PMC6670022; doi:10.1002/1878-0261.12521), 2019-07-10

# NCI-H2106

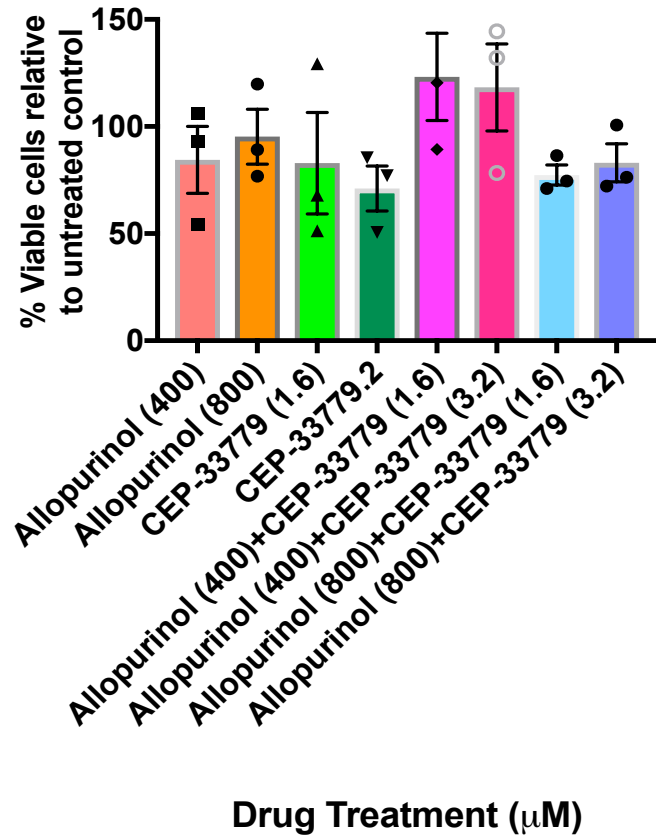

Supplement: MOL2-13-1725-s013.pdf [file MOL2-13-1725-s013.pdf]
